# Supplementary material for: Microbial Dynamics in Mixed-Culture Biofilms of Salmonella Typhimurium and Escherichia coli O157:H7 and Bacteria Surviving Sanitation of Conveyor Belts of Meat Processing Plants
Source: MDPI journal article supplement (doi:10.3390/microorganisms11020421), 2023-02-07
Supplement: s1 [file s1]

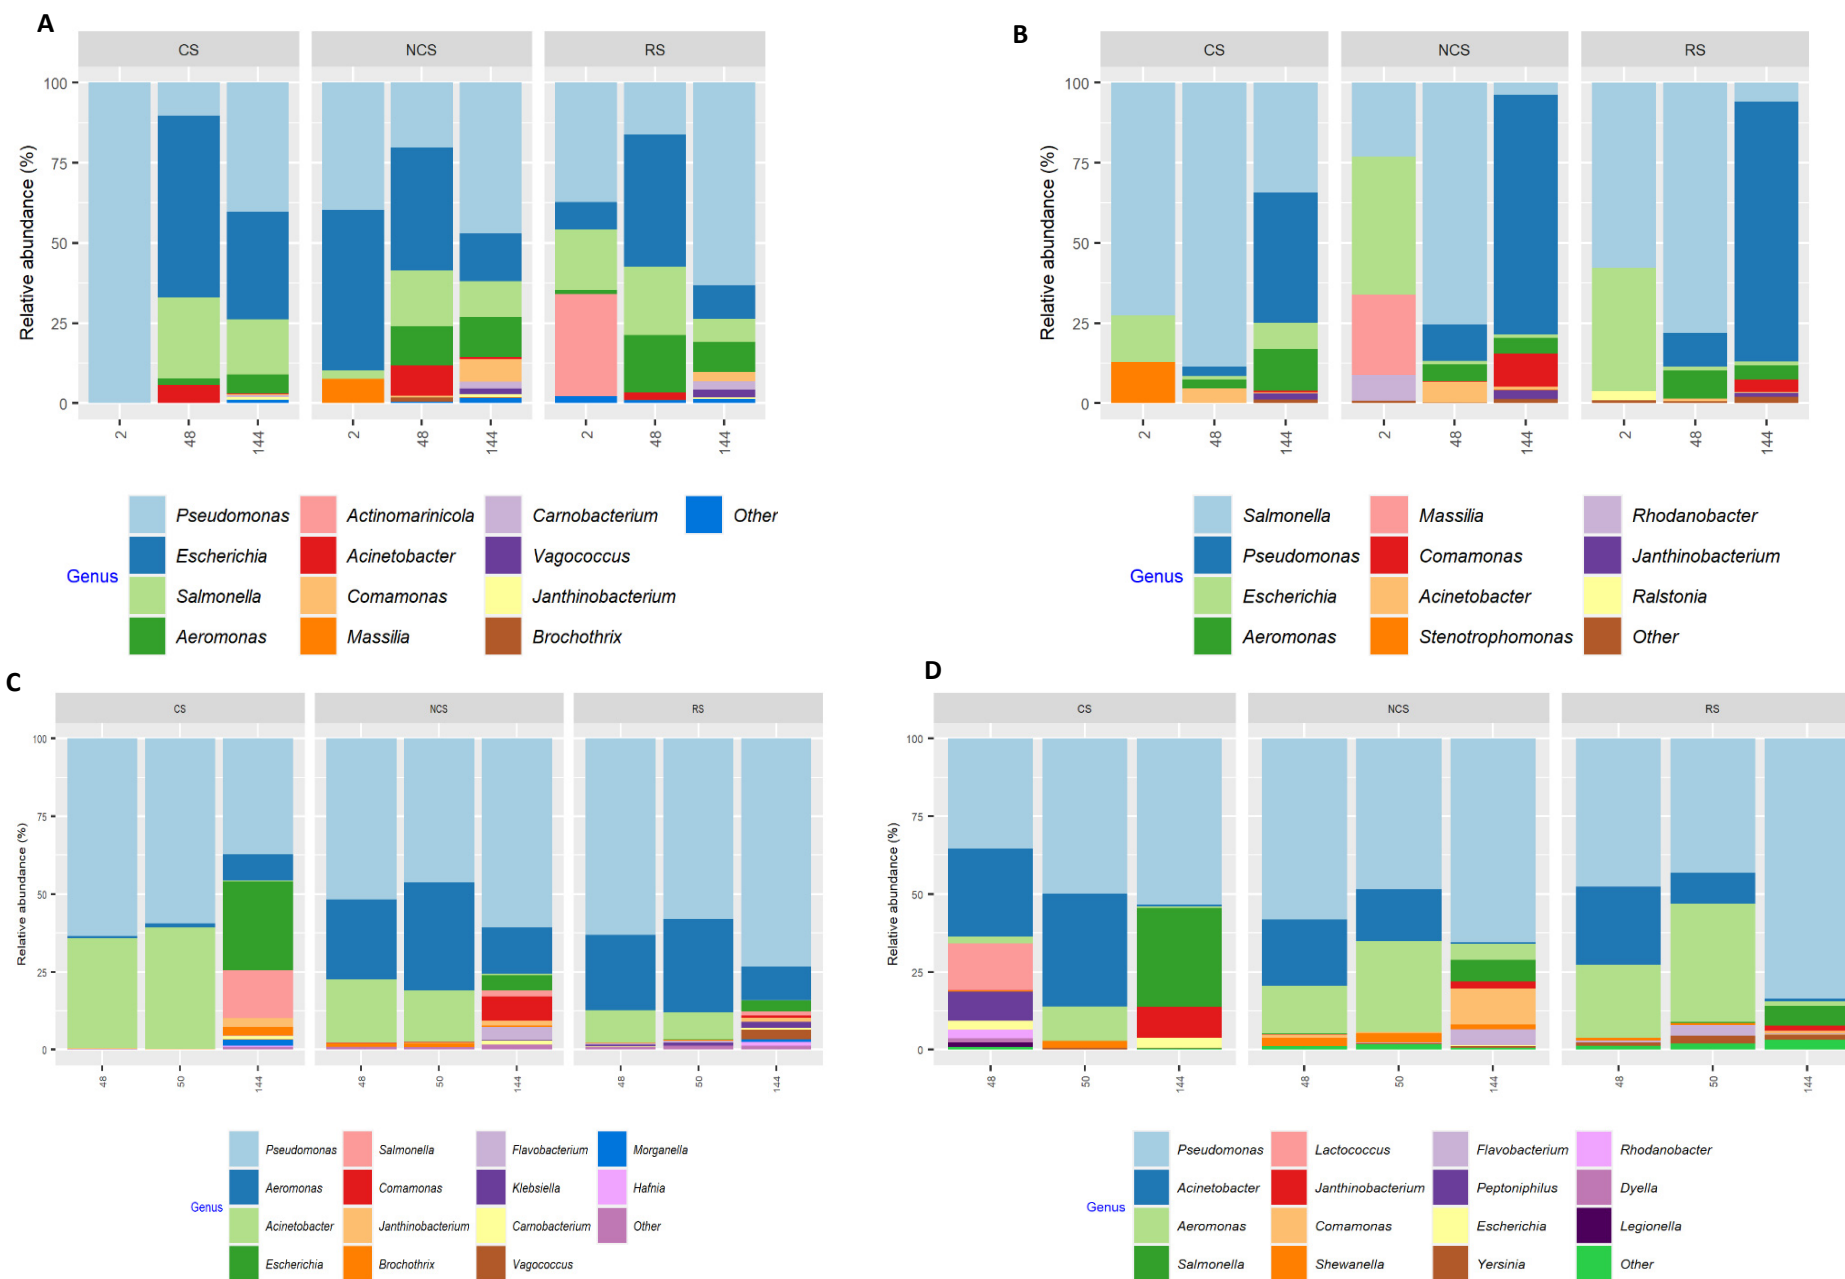

**Figure S1.** Relative abundance of bacterial genera in planktonic cultures and biofilms of meat processing surface bacteria (MPB), *Salmonella* Typhimurium and *Escherichia coli* O157:H7. *S. Typhimurium* and *E. coli* O157:H7 were introduced simultaneously with MPB (A, planktonic; B, biofilms) or delayed by 48 h (C, planktonic; D, biofilms) and incubated in biofilm reactors at 15°C for 6 days. MPB were collected from the contact (C), non-contact (NC) and roller (R) surfaces of a conveyor belt in a beef processing facility.
