# Supplementary material for: Microbial Dynamics in Mixed-Culture Biofilms of Salmonella Typhimurium and Escherichia coli O157:H7 and Bacteria Surviving Sanitation of Conveyor Belts of Meat Processing Plants
Source: Microorganisms. 2023 Feb 7;11(2):421. doi: 10.3390/microorganisms11020421 (PMC9960345; doi:10.3390/microorganisms11020421)
Supplement: Supplementary file 1 [file microorganisms-11-00421-s001.zip › Table S.xlsx]

## Sheet: Table S1
Table S1. Samples removed from analysis.
Trial	Surface	Biofilm development type	Culture type	Sampling time (d)	Label	Reason for removal
1	Contact	Co-development	Coupon	2	1-C-Co-1-T2	Low DNA quantity
1	Contact	Co-development	Suspension	2	1-NC-Co-S-T2	Low DNA quantity
2	Contact	Co-development	Suspension	2	2-C-Co-S-T2	Low DNA quantity
1	Contact	Insertion	Suspension	48	1-C-In-S-48	Low DNA quantity
1	Contact	Insertion	Coupon	50	1-C-In-1-50	Low DNA quantity
1	Contact	Insertion	Coupon	50	1-C-In-2-50	Low DNA quantity
1	Contact	Insertion	Suspension	50	1-C-In-S-50	Low DNA quantity
2	Contact	Co-development	Coupon	144	2-C-Co-1-144	Low DNA quantity
2	Non-contact	Co-development	Coupon	2	2-NC-Co-2-T2	Low DNA quantity
2	Non-contact	Co-development	Coupon	2	2-NC-Co-1-T2	Low DNA quantity
1	Non-contact	Co-development	Suspension	2	1-C-Co-S-T2	Low DNA quantity
2	Roller	Co-development	Coupon	2	2-R-Co-2-T2	Low DNA quantity
3	Roller	Co-development	Coupon	2	3-C-Co-2-T2	Low DNA quantity
2	Roller	Insertion	Coupon	50	2-R-In-1-50	Low DNA quantity
2	Roller	Co-development	Coupon	2	3-R-Co-2-T2	Only 60 sequences in total

## Sheet: Table S2
Table S2. Bacterial genera composition in meat processing surface bacteria (MPB) inocula microbiota from contacting (C), non-contacting (NC), and roller (R) surfaces. Values represent percent relative abundance.
Genus	Contacting surface			Non-contacting surface			Roller surface
	C1	C2	C3	NC1	NC2	NC3	R1	R2	R3
Stenotrophomonas	1.32	-	-	-	-	8.54	-	-	-
Chryseobacterium	-	-	-	-	-	5.29	-	2.41	-
Cloacibacterium	-	-	-	1.61	-	-	-	-	-
Bacteroides	-	9.68	-	22.58	0.71	-	12.77	-	0.64
Psychrobacter	-	-	1.07	-	-	-	-	-	0.31
Burkholderia	-	-	-	-	-	-	-	1.1	-
Yersinia	-	1.98	-	-	0.26	-	-	-	-
Comamonas	49.91	-	-	-	-	-	-	-	-
Polymorphobacter	-	-	-	-	-	5.24	-	-	-
Janthinobacterium	-	27.94	6.82	0.03	7.43	0.43	2.68	0.85	3.6
Brevundimonas	-	-	-	-	1.06	-	-	-	-
Pseudarcobacter	0.66	-	-	2.36	12.51	-	0.44	-	0.23
Pseudomonas	42.53	58.52	76.17	39.23	61.75	55.24	63.31	60.46	83.12
Limnohabitans	-	-	-	-	-	-	1.05	-	-
Acinetobacter	5.03	1.84	0.64	9.09	0.74	15.45	14.95	28.74	4.64
Flavobacterium	-	0.04	5.68	12.08	8.67	1.26	0.1	4.84	1.23
Clostridium	-	-	-	-	0.34	-	1.25	-	-
Herbaspirillum	-	-	-	-	-	-	1.38	-	-
Pseudochrobactrum	-	-	-	-	-	3.13	-	-	-
Aeromonas	-	-	-	6.65	1.11	-	-	0.16	-
Sphingomonas	-	-	8.04	0.21	-	1.11	-	-	-
Rhizobium	-	-	-	2.55	-	1.72	-	-	0.09
Dyella	-	-	-	1.13	-	-	-	-	-
Other	0.55	-	1.59	2.48	5.4	2.59	2.06	1.45	6.12
